# Supplementary material for: Identification of Tumor Suppressors and Oncogenes from Genomic and Epigenetic Features in Ovarian Cancer
Source: PLoS One. 2011 Dec 8;6(12):e28503. doi: 10.1371/journal.pone.0028503 (PMC3234280; doi:10.1371/journal.pone.0028503)
Supplement: Table S4 — All genes captured by Wilcoxon rank test based on copy number variation and expression data. Results of Wilcoxon rank test with BH correction of selected genes in ovarian cancer tumor samples from both MSKCC and TCGA data sets. Bold indicate genes captured from both data sets. (XLS) [file pone.0028503.s012.xls]

## Sheet: Sheet1
Table S4
Wrzeszczynski, KO. & Lucito R., 2011. “Identification of Genomic and Epigenetic Features of Tumor Suppressors and Oncogenes in Ovarian Cancer”.
Cold Spring Harbor Laboratory, Cold Spring Harbor, NY 11724 USA.
Supplementary Table 4: All Genes Captured by Wilcoxon Rank Test Based on Copy Number Variation and Expression Data.*
TCGA Data Set
Gene	p-value	Chromosome	Position
POP4	3.52755e-16	19	34789009
C19orf2	1.09168e-14	19	35125264
CCNE1	1.56486e-14	19	34995400
PLEKHF1	1.09657e-12	19	34848166
PAF1	7.42036e-10	19	44568109
FBL	9.28263e-10	19	45016933
FAM49B	9.89078e-10	8	130922897
CCDC130	2.84493e-09	19	13719752
KRAS	3.29686e-09	12	25249446
RPS16	3.31767e-09	19	44615686
SUPT5H	3.98099e-09	19	44628127
C19orf53	1.1079e-08	19	13746256
KIAA0196	1.71931e-08	8	126105684
CC2D1A	1.82805e-08	19	13877955
UQCRFS1	1.96007e-08	19	34390006
MRPS12	2.23479e-08	19	44113433
ECH1	2.30078e-08	19	43997901
PSMD8	3.42695e-08	19	43557029
STX10	5.18507e-08	19	13116223
NFKBIB	7.88782e-08	19	44082454
TRMT1	9.68369e-08	19	13076713
SARS2	1.45527e-07	19	44097743
PSMC4	1.45806e-07	19	45168912
FBXO17	1.54348e-07	19	44123881
NDUFC2	1.58137e-07	11	77457043
ASF1B	1.58922e-07	19	14091320
PRKACA	1.85907e-07	19	14063506
PHF20L1	1.99232e-07	8	133856785
SPINT2	2.08206e-07	19	43447041
DLL3	4.8851e-07	19	44681396
LYRM5	6.04088e-07	12	25239416
SIRT2	6.38599e-07	19	44061039
C11orf67	7.70104e-07	11	77209855
IER2	8.79675e-07	19	13122281
C19orf57	1.33322e-06	19	13854167
SQLE	2.15659e-06	8	126079900
LRRC6	2.58855e-06	8	133653628
DYRK1B	3.11305e-06	19	45007829
CASC1	1.09379e-05	12	25152489
SSPN	1.57023e-05	12	26239535
BCAT1	1.93507e-05	12	24855545
ST3GAL1	3.27738e-05	8	134536272
NDRG1	8.11464e-05	8	134318595
CD97	8.49958e-05	19	14353212
HNRNPL	8.67692e-05	19	44018867
RASSF8	0.000160864	12	26003235
ZFP36	0.000602041	19	44589326
KHDRBS3	0.00121161	8	136538897
MYC	0.00123319	8	128817496
TRIB1	0.00168576	8	126511744
SAMD4B	0.0034572	19	44524947
MTSS1	0.019188	8	125632208
LGALS14	0.0340452	19	44886785
LPHN1	0.0417866	19	14119550
MSKCC Data Set
POP4	0.00041606	19	34789009
CAPNS1	0.00175439	19	41322757
TBCB	0.00175439	19	41297727
POLR2I	0.00175439	19	41296450
CCNE1	0.00197483	19	34995400
PPCS	0.00294118	1	42694759
AKIRIN1	0.00294118	1	39229502
ZMPSTE24	0.00294118	1	40496319
CTPS	0.00294118	1	41217593
PABPC4	0.00294118	1	39799071
PDCD5	0.00300752	19	37763943
RLF	0.00588235	1	40399627
PEPD	0.00771681	19	38569702
ZNF146	0.00809043	19	41397343
NFYC	0.00971172	1	40929828
PPT1	0.00971172	1	40310968
SF3A3	0.00975652	1	38195238
NDUFS5	0.00975652	1	39264592
TRIT1	0.00975652	1	40079292
UTP11L	0.00975652	1	38250970
CEBPG	0.0103321	19	38556448
ZNF573	0.0105263	19	42921040
LSM14A	0.0105263	19	39355191
TMEM147	0.0116959	19	40728384
PSENEN	0.0116959	19	40928333
INPP5B	0.0117647	1	38098955
USF2	0.0118466	19	40451735
DPY19L4	0.0121212	8	95801278
AKR1A1	0.0130719	1	45789084
PRDX1	0.0130719	1	45749293
GPATCH1	0.0137111	19	38263625
RPS15A	0.014012	16	18701777
KIAA0319L	0.0147059	1	35671678
ZMYM4	0.0147059	1	35507154
KIF2C	0.0147059	1	44978076
C1orf109	0.0147059	1	37919828
GNL2	0.0147059	1	37805000
CEBPA	0.0165413	19	38482681
PPIH	0.0165428	1	42896634
ZBTB10	0.0166667	8	81561002
COQ7	0.0167132	16	18986427
DPH2	0.0177583	1	44208239
INTS8	0.0186336	8	95904709
ZNF643	0.0196144	1	40688365
COL9A2	0.0205882	1	40538749
C19orf2	0.0229722	19	35125264
GRHL2	0.0238095	8	102573843
NBN	0.0242424	8	91014739
UQCRB	0.0242424	8	97308479
ARTN	0.0243167	1	44171578
ZFP112	0.0245732	19	49522545
FFAR2	0.0250269	19	40632456
UQCRFS1	0.0250777	19	34390006
FAM75A3	0.0251594	9	40690290
CKAP2	0.0255679	13	51927495
DBNDD2	0.025641	20	43470328
DDX27	0.025641	20	47269238
ZNF529	0.0271202	19	41726357
KIAA0355	0.0273523	19	39437295
MYCBP	0.0273739	1	39101222
ZNF302	0.0274105	19	39860406
UBA2	0.0274105	19	39611107
ANKRD27	0.0274105	19	37779746
SNX26	0.0283176	19	40958315
MLL4	0.0283176	19	40900760
COX6B1	0.0283176	19	40830994
RBM42	0.0283176	19	40811819
CSF3R	0.0304501	1	36704230
GPBP1L1	0.0304501	1	45865564
SNIP1	0.0304501	1	37774728
TRAPPC3	0.0305521	1	36374759
RNF220	0.0305521	1	44643546
SNX16	0.0316986	8	82874372
CPNE3	0.0316986	8	87595771
SIPA1L3	0.0317569	19	43089707
YRDC	0.0319476	1	38041200
GPI	0.0320801	19	39547908
ZNF180	0.032149	19	49671698
TOMM40	0.032224	19	50086316
ANKRD46	0.0333333	8	101602175
TRMT12	0.0357143	8	125532228
PHF20L1	0.0357143	8	133856785
RBM3	0.0363636	23	48317779
PEX11B	0.0363636	1	144227739
TERF1	0.0363636	8	74083650
PLP2	0.0363636	23	48915216
FTSJ1	0.0363636	23	48221323
STAU1	0.0379494	20	47163282
LRFN3	0.0393161	19	41119861
TPD52	0.0396348	8	81109659
STAU2	0.0446392	8	74624394
EBP	0.0446392	23	48265107
ZNF706	0.0476191	8	102278441
TTC35	0.0476191	8	109525028
OXR1	0.0476191	8	107739211
EBAG9	0.0476191	8	110621104
ENY2	0.0476191	8	110415811
WWP1	0.0484849	8	87424109
*Results of Wilcoxon Rank test with BH correction of selected genes in ovarian cancer tumor samples. Bold indicate genes captured from both data sets.
