# Supplementary material for: Identification of Tumor Suppressors and Oncogenes from Genomic and Epigenetic Features in Ovarian Cancer
Source: PLoS One. 2011 Dec 8;6(12):e28503. doi: 10.1371/journal.pone.0028503 (PMC3234280; doi:10.1371/journal.pone.0028503)
Supplement: Table S5 — Predicted genes with copy number variation, methylation and expression for tumor suppressor and oncogene features in both MSKCC and TCGA data sets. Genes predicted from tumor suppressor and oncogene genomic and epigenetic features are shown. Location for each gene and epigenetic and genomic data values are shown. Thresholds used for each individual platform are provided per feature set. (XLS) [file pone.0028503.s013.xls]

## Sheet: Sheet1
Table S5
Wrzeszczynski, KO. & Lucito R., 2011. “Identification of Genomic and Epigenetic Features of Tumor Suppressors and Oncogenes in Ovarian Cancer”.
Cold Spring Harbor Laboratory, Cold Spring Harbor, NY 11724 USA.
Supplementary Table 5: Predicted Genes with Copy Number Variation, Methylation and Expression For Tumor Suppressor and Oncogene Features in both MSKCC and TCGA Data Sets.
Gene	Chromosome	Position	Frequency CNV	Tumor:Normal Expression Ratio	Avg. Methylation
#Amplified MSKCC genes - Oncogeneic Features
#ExpTN > 1.355 and MET < 1.035
NCDN	1	35692500	0.12	1.4337	0.987
EIF2C3	1	36065900	0.12	1.4097	1.032
SNIP1	1	37671200	0.12	1.469	1.0015
CDCA8	1	37827300	0.12	1.8942	0.8354
FHL3	1	38131500	0.19	1.6775	1.0165
ZNF643	1	40584900	0.19	1.3577	1.0252
KIAA0467	1	43557900	0.18	1.3859	1.019
KIF2C	1	44874600	0.12	2.1204	0.7772
NASP	1	45718800	0.12	1.483	0.9023
SETDB1	1	147712000	0.11	1.4035	0.6534
ADPRH	3	120781000	0.12	1.642	1.0279
GSK3B	3	121023000	0.12	1.4432	0.9824
MCM2	3	128800000	0.12	1.6966	0.9937
TRPA1	8	73096000	0.11	1.4308	0.9162
ATP6V1C1	8	104102000	0.38	1.4314	1.0036
ATAD2	8	124401000	0.43	1.8001	0.9694
LY6E	8	144171000	0.33	1.5463	1.0212
BOP1	8	145457000	0.33	1.5362	1.005
HSF1	8	145486000	0.33	1.3736	1.0168
ZNF507	19	37528400	0.14	1.6569	0.9623
PEPD	19	38569700	0.14	1.3987	1.0069
SNX26	19	40958300	0.11	2.2462	1.0294
MMP9	20	44071000	0.17	1.5055	0.9086
BCAS4	20	48844900	0.1	1.4271	0.9852
MOCS3	20	49008800	0.1	1.4546	0.9371
MBTPS2	23	21617400	0.1	1.3662	0.938
DUSP21	23	44459500	0.2	1.4417	1.0162
PCTK1	23	46833800	0.2	1.507	1.0071
SYN1	23	47187600	0.2	1.8581	1.0316
ELK1	23	47251200	0.2	1.5655	0.995
PORCN	23	48123600	0.2	1.449	1.0295
HDAC6	23	48416700	0.2	1.5014	1.0199
RPS6KA6	23	83125100	0.12	1.4361	0.9817
#Amplified MSKCC - Tumor Suppressor Features
#ExpTN < 0.92 and MET > 1.1
RPS8	1	44910300	0.12	0.7436	1.1133
RBM8A	1	142997000	0.2	0.7421	1.1269
ACP6	1	144344000	0.11	0.9126	1.3247
BOLA1	1	146684000	0.11	0.9043	1.1966
CD47	3	109245000	0.11	0.879	1.1123
FSTL1	3	121596000	0.12	0.8403	1.1284
PDIA5	3	124269000	0.12	0.8236	1.1322
HES1	3	195337000	0.14	0.8153	1.1746
LYN	8	56954900	0.1	0.7863	1.1918
PENK	8	57516100	0.1	0.7725	1.1912
TOX	8	59880500	0.1	0.8741	1.2091
PXMP3	8	78055000	0.3	0.7844	1.1024
TPD52	8	81109700	0.33	0.5714	1.1471
PABPC1	8	101784000	0.33	0.7477	1.1572
AZIN1	8	103908000	0.38	0.9159	1.1567
RIMS2	8	104582000	0.38	0.8442	1.1642
GPI	19	39547900	0.1	0.8839	1.1031
COX7A1	19	41333700	0.15	0.7986	1.6405
ZNF334	20	44563100	0.17	0.8377	1.1142
PRPS2	23	12569100	0.18	0.7711	1.1414
RAB9A	23	13467000	0.18	0.806	1.1348
PIR	23	15162600	0.18	0.8318	1.1677
RPS6KA3	23	19927700	0.1	0.8276	1.1493
TMEM47	23	34404800	0.1	0.7407	1.1454
XK	23	37301300	0.1	0.6773	1.1037
SRPX	23	37764800	0.1	0.7715	1.1018
BCOR	23	39666700	0.1	0.8695	1.1144
MAOA	23	43271700	0.2	0.6822	1.1516
GSPT2	23	51319500	0.12	0.6999	1.1126
GPRASP1	23	101712000	0.14	0.7776	1.1584
TSC22D3	23	106763000	0.14	0.8955	1.1469
STAG2	23	122820000	0.14	0.7996	1.1113
MOSPD1	23	133747000	0.14	0.7663	1.1394
FHL1	23	134954000	0.14	0.7306	1.1612
SOX3	23	139311000	0.14	0.5959	1.137
CETN2	23	151666000	0.14	0.734	1.1203
NSDHL	23	151670000	0.14	0.8736	1.2493
RPL10	23	153147000	0.14	0.5568	1.2948
#Deleted MSKCC - Oncgenic Features
#ExpTN > 1.355 and MET < 1.035
CCRN4L	4	140295000	0.1	1.639	0.9488
GPR12	13	26227300	0.12	1.6247	1.026
THSD1	13	51849300	0.1	1.4004	0.9893
RPAP1	15	39596700	0.14	1.3951	0.9839
RGS11	16	258310	0.1	1.5209	0.7198
MT1E	16	55217100	0.11	1.3797	1.013
KIFC3	16	56349600	0.11	1.6709	1.009
PDPR	16	68705000	0.22	1.5435	0.9114
ARRB2	17	4560540	0.5	1.3824	1.0098
EIF5A	17	7151040	0.4	1.3772	0.974
COX10	17	13913400	0.6	1.4356	1.03
TOP3A	17	18118000	0.6	1.4687	0.9685
STARD3	17	35046900	0.33	1.5421	0.9677
ATP6V0A1	17	37864400	0.5	1.5401	1.0298
RND2	17	38430800	0.5	1.4805	0.9761
HOXB8	17	44044700	0.11	1.4918	1.0217
ABCC3	17	46067200	0.17	1.4455	0.8763
RECQL5	17	71134500	0.14	1.3978	1.0155
TK1	17	73681800	0.29	1.8532	0.9517
BCL3	19	49943800	0.14	1.4284	1.0114
CD3EAP	19	50601300	0.15	1.5761	0.9598
EML2	19	50804500	0.15	1.5691	0.9816
SYMPK	19	51010500	0.15	1.3858	0.9775
PPP5C	19	51542100	0.15	1.4689	0.9059
EHD2	19	52908400	0.15	1.4791	1.0076
SYNGR4	19	53559500	0.15	1.8163	1.0302
DKKL1	19	54558900	0.15	1.5346	0.9638
RCN3	19	54722700	0.15	1.5715	0.8663
ATF5	19	55123800	0.15	1.4013	0.9515
ZNF528	19	57592900	0.15	1.4208	0.8699
ZNF324	19	63670300	0.2	1.5325	1.0323
USP18	22	17007300	0.71	1.4004	0.9965
CDC45L	22	17842000	0.71	1.5355	1.029
PPIL2	22	20344800	0.71	1.6341	1.0305
PRAME	22	21214700	0.71	1.9429	1.0338
LIF	22	28961000	0.5	1.7199	1.0116
OSBP2	22	29415300	0.5	1.8656	1.025
SH3BP1	22	36360200	0.67	1.6584	0.9872
MAPK12	22	48993800	0.67	1.4661	0.9807
ADM2	22	49210200	0.67	1.6817	0.9651
TMSB4Y	24	14253600	0.97	1.3952	1.0005
#Deleted MSKCC - Tumor Suppressor Features
#ExpTN < 0.92 and MET > 1.1
PLA2G12A	4	110989000	0.11	0.7714	1.2124
ENPEP	4	111755000	0.11	0.9049	1.1869
SEC24D	4	120002000	0.11	0.817	1.1223
FGF2	4	124105000	0.11	0.7136	1.1801
CLGN	4	141667000	0.1	0.6048	1.1061
LSM6	4	147454000	0.1	0.7796	1.2227
NR3C2	4	149358000	0.1	0.8269	1.12
GUCY1B3	4	157038000	0.11	0.7036	1.2453
CTSO	4	157203000	0.11	0.8816	1.3619
GLRB	4	158355000	0.11	0.7313	1.1313
GRIA2	4	158499000	0.11	0.8294	1.1514
PPID	4	159988000	0.11	0.7825	1.1966
SC4MOL	4	166606000	0.11	0.6571	1.2607
SPOCK3	4	168029000	0.11	0.8992	1.2335
CLCN3	4	170916000	0.11	0.8781	1.1058
GALNT7	4	174465000	0.11	0.6043	1.1569
HMGB2	4	174627000	0.11	0.8002	1.1858
VEGFC	4	177980000	0.11	0.8781	1.1039
AGA	4	178727000	0.11	0.7575	1.1947
DCTD	4	184186000	0.11	0.8506	1.2466
UNC84A	7	629492	0.11	0.5907	1.1054
AGPAT5	8	6553280	0.19	0.6846	1.1329
MFHAS1	8	8679410	0.14	0.6993	1.173
FDFT1	8	11697600	0.14	0.7304	1.1485
MTUS1	8	17545600	0.14	0.852	1.112
SLC39A14	8	22280700	0.14	0.8366	1.2386
EGR3	8	22601100	0.14	0.8752	1.2004
KCTD9	8	25341300	0.13	0.7504	1.1062
DPYSL2	8	26491300	0.13	0.6979	1.1018
FZD3	8	28407700	0.13	0.6864	1.1109
MTMR6	13	24718300	0.12	0.7231	1.1578
RNF6	13	25684900	0.12	0.8838	1.105
HSPH1	13	30608800	0.12	0.8701	1.1905
KL	13	32488600	0.12	0.9113	1.1339
CCNA1	13	35904000	0.12	0.6651	1.1187
ALG5	13	36421900	0.12	0.6846	1.1269
LHFP	13	38815000	0.11	0.6418	1.139
WBP4	13	40533700	0.12	0.906	1.1442
GTF2F2	13	44592600	0.12	0.7167	1.1159
ITM2B	13	47705300	0.25	0.8241	1.1782
RB1	13	47775900	0.25	0.8393	1.1056
KCTD12	13	76352300	0.12	0.5153	1.1151
MYCBP2	13	76516800	0.12	0.8261	1.1839
SLITRK5	13	87122900	0.11	0.5667	1.1276
ABCC4	13	94470100	0.11	0.656	1.1109
CLDN10	13	94883900	0.11	0.6068	1.1295
DZIP1	13	95028500	0.12	0.86	1.2597
STK24	13	97900500	0.12	0.8148	1.1219
TM9SF2	13	98951700	0.12	0.8776	1.1068
PCCA	13	99539300	0.12	0.5721	1.143
FGF14	13	101171000	0.12	0.6996	1.1255
IRS2	13	109204000	0.11	0.8281	1.1647
CDC42BPB	14	102468000	0.12	0.8997	1.1778
EIF5	14	102870000	0.12	0.8385	1.1301
MARK3	14	102921000	0.12	0.8187	1.1482
CKB	14	103056000	0.12	0.7216	1.2637
MEIS2	15	34970500	0.14	0.8687	1.2671
RASGRP1	15	36567600	0.14	0.6008	1.1479
CHP	15	39310700	0.14	0.8532	1.1639
LCMT2	15	41407300	0.14	0.5088	1.1134
SQRDL	15	43714500	0.14	0.7885	1.1058
HBA2	16	162845	0.1	0.5208	1.1148
VPS35	16	45251100	0.11	0.8404	1.2255
SALL1	16	49727400	0.11	0.7634	1.184
CTCF	16	66154000	0.22	0.7834	1.1376
GLG1	16	73038800	0.22	0.9117	1.141
MAP1LC3B	16	85983300	0.12	0.8403	1.3284
SCARF1	17	1483900	0.4	0.7881	1.1097
UBE2G1	17	4119260	0.6	0.8441	1.1012
ZNF232	17	4949760	0.5	0.8997	1.1719
C1QBP	17	5276820	0.5	0.8853	1.2189
MIS12	17	5330970	0.5	0.7456	1.1242
EIF4A1	17	7416780	0.4	0.8879	1.1355
MYH10	17	8318260	0.5	0.8602	1.2247
DNAH9	17	11442500	0.6	0.7053	1.1124
UBB	17	16225100	0.5	0.7166	1.2861
PEMT	17	17349600	0.6	0.8721	1.334
PRPSAP2	17	18702200	0.6	0.8314	1.1851
CRLF3	17	26133800	0.5	0.9097	1.1381
RHOT1	17	27493600	0.6	0.7973	1.1235
TAF15	17	31160600	0.6	0.9066	1.2676
IGFBP4	17	35853200	0.5	0.8433	1.1101
SMARCE1	17	36037500	0.5	0.7024	1.1157
KRT19	17	36933400	0.5	0.7754	1.1023
STAT3	17	37718900	0.5	0.8183	1.1984
PTRF	17	37808000	0.5	0.9172	1.21
NPEPPS	17	42963400	0.5	0.7944	1.2089
KPNB1	17	43082300	0.5	0.7602	1.1469
HOXB6	17	44028100	0.11	0.6515	1.1457
SPOP	17	45031200	0.17	0.8373	1.1351
MMD	17	50825000	0.17	0.8398	1.1232
COIL	17	52370600	0.14	0.8748	1.1287
SFRS1	17	53433300	0.17	0.865	1.1462
APPBP2	17	55875300	0.17	0.721	1.1047
PSMC5	17	59258500	0.17	0.7573	1.11
SMURF2	17	59971200	0.17	0.7339	1.2663
PRKAR1A	17	64019700	0.14	0.6268	1.2046
KCNJ2	17	65677300	0.17	0.8526	1.1032
SOX9	17	67628800	0.17	0.8386	1.2167
SLC9A3R1	17	70256400	0.17	0.878	1.2397
ICT1	17	70520400	0.17	0.8348	1.1128
H3F3B	17	71284100	0.14	0.7569	1.3005
ST6GALNAC2	17	72073100	0.29	0.7707	1.1755
SYNGR2	17	73676300	0.29	0.8081	1.1316
DCXR	17	77587000	0.14	0.9132	1.1549
RAB40B	17	78208200	0.14	0.7877	1.1218
AP2S1	19	52033300	0.15	0.9179	1.111
SAE1	19	52325900	0.15	0.9143	1.165
NDUFA3	19	59298000	0.15	0.8488	1.1157
RPS9	19	59396500	0.15	0.86	1.1179
HIRA	22	17692800	0.71	0.8336	1.1195
MRPL40	22	17794600	0.71	0.8026	1.1061
CLDN5	22	17885100	0.71	0.8472	1.19
SNAP29	22	19537800	0.71	0.8618	1.1705
MAPK1	22	20438500	0.71	0.9144	1.1476
PITPNB	22	26572200	0.71	0.9073	1.1587
XBP1	22	27515100	0.71	0.8918	1.1093
YWHAH	22	30665000	0.5	0.9023	1.108
TST	22	35731400	0.67	0.7322	1.1361
MAFF	22	36922400	0.67	0.8597	1.311
TNRC6B	22	38765300	0.67	0.8912	1.1053
ADSL	22	39067000	0.67	0.8847	1.1307
EP300	22	39813100	0.67	0.8223	1.1584
TOB2	22	40154000	0.67	0.8884	1.1102
BIK	22	41831300	0.67	0.7195	1.1886
RIBC2	22	44130100	0.67	0.6222	1.1058
#Amplified TCGA - Oncogenic Features
Gene	Methylation	Tumor:Norma Expression	Tumor Expression Avg.	Normal Expression Average
ERAL1	0.0406395	1.545	8.472	5.482
PAK1	0.0576162	1.812	7.026	3.878
TPX2	0.0456483	2.337	8.996	3.85
HMGCS2	0.30294	2.144	6.736	3.142
CENPQ	0.363755	1.61	5.989	3.72
CHORDC1	0.022057	1.518	9.178	6.046
IGF2BP3	0.0110825	2.506	8.848	3.531
TRIM33	0.0061115	1.574	9.664	6.14
AGPAT1	0.067505	1.541	9.044	5.869
HOXA1	0.0119147	2.169	7.508	3.462
IGSF3	0.0218245	1.506	7.834	5.203
YEATS4	0.0647231	1.823	8.474	4.649
CDC25B	0.0374502	1.593	8.484	5.325
COL9A2	0.0382179	1.743	6.378	3.659
SNX16	0.005983	1.579	5.782	3.661
PDCD5	0.130148	1.51	8.616	5.706
CLDN16	0.100265	1.997	8.419	4.215
ALDOC	0.0413337	1.733	8.061	4.653
TMCO3	0.0640258	1.942	7.05	3.63
GDPD5	0.193677	1.567	6.402	4.086
BIRC5	0.0258056	2.291	8.096	3.534
MRPL52	0.0368822	1.58	5.968	3.776
FOXM1	0.0305339	1.647	6.317	3.835
USP14	0.027007	1.6	11.49	7.181
BOP1	0.0312064	1.54	6.354	4.125
TOR3A	0.0111805	1.573	8.542	5.429
PREP	0.0358749	1.594	8.036	5.04
ZSCAN16	0.0204974	1.609	7.581	4.712
ENOSF1	0.271777	1.521	9.901	6.508
C11orf73	0.0416556	1.743	7.607	4.363
CDCA4	0.0437339	1.898	9.218	4.856
DNMT3B	0.301535	1.744	6.413	3.676
DDX39	0.0332972	1.515	9.582	6.323
ZNF24	0.0384086	1.507	7.612	5.05
PIP4K2B	0.027735	1.554	7.402	4.762
RYR1	0.0572328	1.611	5.957	3.698
ZMAT5	0.0238948	1.51	7.164	4.744
LIF	0.200978	1.643	5.844	3.556
SUV39H2	0.0339221	1.784	5.114	2.866
KLHL7	0.0234768	1.686	6.342	3.762
AURKA	0.12317	1.801	7.236	4.018
NFYA	0.0458894	1.577	5.479	3.475
LACTB2	0.10263	1.516	7.812	5.154
SNN	0.102244	1.594	7.024	4.405
ZNF667	0.0797036	1.71	6.184	3.616
GABBR1	0.0234687	2.117	8.424	3.98
PAFAH1B3	0.0651095	1.55	8.952	5.775
TRIM45	0.0504569	1.525	6.584	4.319
RGS20	0.105291	1.517	4.364	2.877
UPK1B	0.131268	1.549	8.265	5.335
SFTPD	0.188107	1.848	7.535	4.079
ENO2	0.0180881	1.543	7.65	4.958
LRP5	0.0857085	1.502	7.838	5.219
PPFIBP1	0.0660194	1.531	6.786	4.434
MCM10	0.0266037	2.649	7.995	3.018
IGF2AS	0.0448383	1.547	5.288	3.417
ZNF136	0.0281151	1.733	7.628	4.4
EIF2C3	0.040958	1.824	8.729	4.785
STRN3	0.0287535	1.5	6.311	4.208
TYMS	0.0914445	2.044	11.806	5.777
ECHDC3	0.057137	1.539	8.539	5.547
CCT6B	0.013353	1.877	8.773	4.673
ITGB8	0.0197659	1.716	5.906	3.441
CDR2L	0.0277942	2.02	10.088	4.995
DHCR7	0.0977156	1.642	7.189	4.377
VEGFA	0.0170514	1.658	7.542	4.548
ZWINT	0.0346175	2.02	9.683	4.793
LRRC8E	0.0148285	1.549	5.49	3.544
ZNF223	0.0527883	1.763	6.529	3.703
YES1	0.0476142	1.636	10.798	6.598
ABT1	0.0292495	1.532	7.558	4.935
GAL	0.215565	2.758	11.079	4.016
COCH	0.121879	2.189	8.073	3.688
HRASLS	0.0937292	1.771	6.042	3.411
NRTN	0.324821	1.505	5.101	3.39
UPF1	0.001928	1.593	7.556	4.744
TARBP1	0.0180983	1.563	8.209	5.251
CDC40	0.0931073	1.644	8.704	5.294
GTPBP2	0.0156416	1.616	7.764	4.806
SLC2A1	0.0368577	1.609	11.267	7.003
HMBS	0.042542	1.557	7.969	5.118
ECT2	0.0112844	2.105	8.155	3.875
MYBL1	0.0735224	1.535	5.239	3.414
GGH	0.0340016	1.588	7.55	4.754
PPP1R13L	0.0372945	1.653	7.254	4.388
C12orf11	0.0410349	1.528	8.908	5.831
RB1CC1	0.0490658	1.61	9.755	6.059
TRMT1	0.0449507	1.601	7.506	4.689
IGF2BP2	0.0392324	1.545	11.529	7.463
SPAG5	0.0508844	2.14	8.357	3.905
ANGPTL4	0.0809132	1.615	5.701	3.529
ERCC4	0.0102383	1.659	5.662	3.412
PPP5C	0.0320711	1.563	6.459	4.131
TBCE	0.0300449	1.621	8.132	5.018
G3BP2	0.0344014	1.524	8.938	5.865
TACC3	0.0439051	2.275	8.71	3.829
PAX6	0.0399147	1.733	5.689	3.283
NUPL2	0.00684875	1.673	7.992	4.776
AFAP1	0.332996	1.724	7.45	4.321
ZNF132	0.0143396	1.611	5.623	3.491
PRPF31	0.0164602	1.571	8.253	5.254
HSPA14	0.0417853	1.566	9.368	5.982
NFE2L3	0.0141945	1.993	7.684	3.855
CEP55	0.0315949	2.793	9.272	3.32
MPP6	0.012968	1.744	6.703	3.844
ZNF426	0.0366253	1.551	6.373	4.11
CRIP2	0.0473593	1.511	10.026	6.635
DAXX	0.0119565	1.518	7.23	4.762
EIF4EBP1	0.0298554	1.569	8.362	5.329
GSPT1	0.0201229	1.631	10.994	6.74
PDE6B	0.0289025	1.766	7.078	4.008
SYT11	0.0272036	1.697	6.465	3.809
PDXDC1	0.0182118	1.513	11.406	7.537
MED15	0.22466	1.554	7.167	4.611
TFAP2A	0.0321037	1.894	7.199	3.8
RAD51AP1	0.0362172	2.37	8.334	3.517
POLH	0.0139946	1.616	6.685	4.137
PKIA	0.03078	1.504	6.514	4.33
STX10	0.061308	1.504	7.87	5.232
CXCL10	0.119592	1.89	8.924	4.722
CA8	0.0399113	1.665	5.87	3.525
COL4A1	0.113395	1.537	9.477	6.164
CABYR	0.0210862	1.555	5.324	3.424
CLIP3	0.19457	1.564	8.354	5.34
ELOVL1	0.0814896	1.503	8.841	5.884
C17orf81	0.043245	1.807	9.502	5.258
SAPS3	0.0384596	1.652	8.073	4.885
MRPS15	0.0354937	1.582	9.509	6.01
PPP1R1A	0.0218207	1.78	6.728	3.779
NMU	0.049257	2.402	10.942	4.556
MYCL1	0.0145681	1.833	7.55	4.119
ABCC1	0.336185	1.703	8.278	4.861
FAM46C	0.0315116	2.098	7.844	3.74
CNOT3	0.0159548	1.567	5.878	3.752
NLE1	0.0280935	1.91	7.205	3.773
NRBF2	0.0272812	1.871	8.729	4.665
MTL5	0.0931995	2.139	8.428	3.941
KCNMB4	0.0190025	1.603	6.392	3.988
NARS2	0.0848639	1.529	9.835	6.433
STX6	0.00161195	1.529	6.977	4.564
MMP10	0.224073	1.968	6.494	3.3
SIVA1	0.0608472	1.508	9.843	6.526
PBX2	0.0642587	1.769	7.901	4.465
C20orf39	0.217019	1.596	8.496	5.323
EDEM3	0.0210843	1.805	7.568	4.194
SLC17A5	0.021773	1.931	9.397	4.867
EFS	0.285535	1.534	6.205	4.045
ZNF652	0.0444394	1.811	8.001	4.417
RPL39L	0.173051	1.642	8.114	4.94
RRN3	0.0134951	1.643	7.782	4.736
PANX1	0.005358	1.51	7.422	4.916
MED20	0.0894624	1.508	6.694	4.44
C19orf40	0.021685	1.617	5.437	3.363
DCK	0.0318426	1.559	8.131	5.215
ZNF230	0.0175708	1.53	6.53	4.268
THOC5	0.0414817	1.554	6.493	4.179
CALB1	0.0492866	2.513	8.128	3.234
C18orf8	0.0377038	1.601	7.84	4.897
FASN	0.0639672	1.515	6.191	4.085
TTF2	0.00675022	2.225	8.346	3.751
ACTL6A	0.0156361	1.633	9.244	5.661
ARHGEF7	0.0640871	1.583	8.719	5.508
YBX2	0.0679223	1.738	6.239	3.59
ANKRD10	0.064772	1.53	7.957	5.2
ZNF43	0.262531	1.603	7.977	4.976
DVL2	0.0318888	1.817	8.63	4.751
EZH2	0.00873755	2.364	8.264	3.496
GRB7	0.0534739	1.603	8.264	5.156
PRKCI	0.0283354	1.508	9.28	6.154
LEPRE1	0.0477366	1.532	6.589	4.3
ZNF8	0.0274225	2.072	8.114	3.916
TNFRSF11B	0.0806339	1.705	6.395	3.751
ASF1B	0.0447947	1.781	6.938	3.896
LETM1	0.0742138	1.732	6.244	3.604
MAL	0.0387565	2.655	10.946	4.122
PRRG4	0.0421469	1.896	7.944	4.189
DSC2	0.0352782	1.906	8.084	4.241
MYBL2	0.0793545	1.647	5.986	3.635
MYO10	0.0356115	1.524	7.308	4.796
PRKAA1	0.0517368	1.576	5.794	3.676
SNX10	0.018642	1.555	7.717	4.961
NRAS	0.0336159	2.161	9.646	4.463
C1orf21	0.045495	1.858	7.468	4.02
PIM1	0.136544	1.774	7.173	4.044
ARNTL2	0.0440139	1.8	6.212	3.452
MAP4K1	0.0611465	1.639	6.133	3.742
MCM3	0.0641485	1.53	9.304	6.08
HIST3H2A	0.0184568	1.695	8.143	4.806
CTPS	0.186211	1.618	8.052	4.977
ZNF236	0.352224	1.536	6.319	4.115
PRKAB2	0.0424569	1.592	5.295	3.326
MAP3K8	0.00576655	1.508	6.461	4.284
UBE2M	0.0107842	1.621	9.438	5.822
FKBPL	0.0951214	1.604	7.771	4.843
ANGEL1	0.0182344	1.79	7.626	4.261
CLUL1	0.0453982	2.932	9.602	3.275
GLT25D1	0.0448707	1.521	7.193	4.728
SARM1	0.009446	1.575	6.581	4.178
C8orf55	0.0418671	1.69	6.948	4.111
THOC1	0.190561	1.671	10.292	6.158
FBXO17	0.0532424	1.586	6.64	4.187
GPRC5A	0.0656338	1.512	6.993	4.626
TCEB3	0.0176613	1.589	8.54	5.375
SLC4A2	0.0200545	1.599	7.46	4.666
PCID2	0.0830093	1.624	10.258	6.315
CDC20	0.053732	1.843	7.365	3.995
NMT2	0.057244	1.673	7.083	4.233
ZNF787	0.0922072	1.619	7.431	4.591
HOXA7	0.319918	1.564	6.005	3.839
SOAT1	0.208442	1.859	8.263	4.445
WHSC2	0.016397	1.582	8.381	5.296
TRIP13	0.0461465	1.534	8.454	5.51
GABPA	0.0668517	1.694	6.181	3.649
BATF	0.0652941	1.623	6.186	3.812
HMGA2	0.0279006	2.302	9.134	3.968
C1orf109	0.0364094	1.603	7.77	4.847
C11orf30	0.0325986	1.578	6.088	3.858
TNFAIP1	0.0097155	1.864	8.595	4.612
PPT2	0.0993402	1.615	7.326	4.535
GPATCH1	0.0664245	1.525	7.211	4.728
LRP6	0.100546	1.555	7.494	4.82
UVRAG	0.0291497	1.528	9.524	6.232
IFI6	0.0854099	1.597	11.315	7.084
IGF2	0.120817	1.583	12.565	7.936
ATAD2	0.0519705	2.236	7.293	3.261
MCOLN1	0.0161301	1.614	6.071	3.76
MED17	0.007161	1.645	9.561	5.813
UBE2C	0.0480203	2.027	10.458	5.16
TFDP1	0.070885	1.732	9.997	5.771
GINS4	0.107979	1.899	6.567	3.459
FIP1L1	0.0320745	1.506	8.721	5.793
FXYD7	0.0680279	1.501	4.801	3.199
PFDN6	0.0402017	1.625	8	4.923
TRAF4	0.0498499	1.749	7.216	4.126
BFAR	0.0239159	1.559	8.93	5.727
ZNF14	0.0191105	1.535	7.333	4.778
TPK1	0.0745121	1.77	7.217	4.076
NLGN1	0.0179614	1.54	5.877	3.815
CEBPG	0.151958	1.586	7.869	4.961
SCARB2	0.06732	1.509	9.222	6.111
JARID2	0.0334162	1.671	8.361	5.005
IL22RA1	0.107355	1.719	6.569	3.821
HOXA4	0.135015	1.538	8.767	5.701
GPR172A	0.397635	1.767	7.216	4.083
FLAD1	0.0524366	1.507	7.037	4.67
MSH2	0.0498917	1.593	8.837	5.546
FAM82B	0.011944	1.51	7.576	5.019
NAT11	0.00690701	1.677	6.664	3.975
MAT1A	0.0939291	1.63	5.432	3.332
RNASEH2A	0.214113	1.591	8.412	5.289
NUP54	0.0194389	1.501	10.347	6.892
TIMM44	0.0451544	1.645	7.62	4.631
ILVBL	0.0294327	1.634	7.992	4.89
MLH3	0.0269416	1.762	7.64	4.337
CD320	0.0247904	1.552	8.029	5.172
TM7SF3	0.0342544	1.573	6.769	4.304
RAD51L3	0.029419	1.95	6.624	3.396
GALE	0.0339889	1.615	7.708	4.772
WWTR1	0.00956975	1.561	6.186	3.963
PPP1R16B	0.13154	1.503	6.478	4.311
FGF3	0.0179011	1.777	5.783	3.254
CDK5	0.0358881	1.515	7.084	4.676
PPFIA1	0.0226401	1.607	7.333	4.563
TMEM30A	0.0127961	1.557	9.85	6.325
ME3	0.0565921	1.53	6.39	4.176
SMPDL3B	0.0266748	2.002	8.728	4.359
CUL4A	0.146145	1.654	9.889	5.98
SCRIB	0.045795	1.536	8.32	5.418
LASS4	0.0375609	1.541	5.468	3.549
UNC119	0.185158	1.593	7.529	4.726
YAP1	0.0210944	1.749	9.879	5.649
SS18L1	0.0660663	1.708	7.438	4.356
DSN1	0.0733149	1.525	5.962	3.911
BCL11A	0.0974944	1.52	8.335	5.485
STRN4	0.156833	1.558	7.666	4.921
PVRL3	0.0425508	1.737	8.181	4.709
ZNF250	0.0164962	1.534	6.348	4.138
KCNK5	0.036805	1.716	5.85	3.41
NP	0.0240992	1.509	7.919	5.246
BCAT1	0.0967427	2.354	7.97	3.385
ING1	0.0902268	1.822	9.164	5.029
LIG3	0.067456	1.925	7.696	3.999
ZNF133	0.0756607	1.603	7.51	4.685
E2F3	0.0317207	1.71	8.226	4.811
NCAPG	0.129965	1.794	5.937	3.31
PYCRL	0.0558185	1.501	5.918	3.942
CDKAL1	0.0180547	1.803	5.721	3.172
LRIG2	0.056128	1.926	7.473	3.879
CDCA8	0.035701	2.048	8.256	4.031
#Amplified TCGA - Tumor Suppressor Features
LGALS4	0.896381	0.776	3.874	4.99
LY96	0.911601	0.727	3.341	4.594
KLRB1	0.82523	0.692	3.483	5.031
SPINK1	0.890624	0.744	3.108	4.18
PLA2G2A	0.825347	0.731	4.599	6.291
CRISP2	0.932958	0.545	3.382	6.204
P2RY13	0.82055	0.747	2.887	3.863
GSTA3	0.879711	0.511	3.829	7.488
FABP4	0.847841	0.776	3.457	4.454
MAK	0.970227	0.593	3.336	5.622
#Deleted TCGA - Tumor Suppressor Features
LTBP4	0.83535	0.8	3.935	4.918
CCL19	0.872599	0.754	3.629	4.813
CRELD2	0.839683	0.779	6.038	7.752
PPBP	0.804509	0.728	2.898	3.982
PIK3R1	0.824865	0.727	5.312	7.303
GSTM5	0.912598	0.614	3.311	5.389
C7	0.869891	0.683	5.066	7.416
SIL1	0.891324	0.781	4.535	5.807
CLN5	0.845492	0.711	5.228	7.352
PRF1	0.808229	0.791	3.616	4.572
VAMP5	0.890822	0.777	3.69	4.746
MUC13	0.864602	0.78	3.135	4.017
SPINK1	0.899806	0.784	3.278	4.18
CHMP4A	0.834929	0.756	5.728	7.575
CILP	0.883384	0.503	4.235	8.42
CALML4	0.870402	0.746	4.529	6.067
PLA2G2A	0.831081	0.62	3.9	6.291
RCAN2	0.843433	0.761	4.094	5.376
RDBP	0.874455	0.794	7.327	9.222
TYROBP	0.871738	0.735	5.544	7.544
BDH1	0.939631	0.779	4.268	5.48
FABP1	0.878996	0.705	3.128	4.44
PROM1	0.844763	0.638	4.883	7.648
ACD	0.911875	0.796	5.001	6.279
LGALS4	0.891995	0.759	3.789	4.99
ASPN	0.818792	0.59	3.811	6.464
TMC5	0.835164	0.705	3.742	5.309
RAB4A	0.946956	0.775	4.811	6.205
APOC2	0.822737	0.751	4.387	5.841
FILIP1L	0.857674	0.727	4.78	6.572
DLG5	0.811483	0.791	6.006	7.597
SERPINA5	0.865844	0.711	5.106	7.186
SOD3	0.812148	0.659	3.728	5.66
GATAD2A	0.892121	0.794	5.249	6.611
CORO2B	0.913884	0.7	3.952	5.65
TIE1	0.80642	0.8	3.491	4.366
C5orf23	0.881465	0.764	4.485	5.874
DPT	0.854494	0.593	3.347	5.639
RGS5	0.802235	0.649	5.081	7.834
MAK	0.808287	0.675	3.794	5.622
WNT5B	0.872287	0.786	3.264	4.152
C6	0.827927	0.368	3.521	9.579
B9D1	0.845227	0.764	4.025	5.265
BBS1	0.906446	0.762	6.378	8.371
CPB1	0.801015	0.78	3.035	3.889
DOCK1	0.893558	0.719	4.427	6.155
CECR1	0.822567	0.737	6.322	8.576
ACSBG1	0.816649	0.792	3.449	4.356
HAMP	0.841094	0.707	3.313	4.685
DNAI2	0.801401	0.575	3.086	5.365
ATF3	0.806848	0.617	5.147	8.341
SRI	0.912858	0.778	6.861	8.818
EPB41L2	0.832588	0.707	5.39	7.627
CD52	0.812172	0.794	4.249	5.352
#Deleted TCGA - Oncogenic Features
CCNB2	0.059844	1.589	6.715	4.225
EXO1	0.062012	1.571	5.333	3.394
TTF2	0.0231996	1.513	5.675	3.751
MAL	0.186238	2.179	8.982	4.122
KLK5	0.373533	1.775	5.973	3.364
RACGAP1	0.159394	1.504	7.19	4.78
SST	0.28408	2.019	9.105	4.511
MYBL2	0.0655626	1.64	5.96	3.635
PBK	0.116256	1.817	5.963	3.282
DTL	0.196682	1.547	5.29	3.419
TTK	0.120317	1.86	5.926	3.186
NDC80	0.0571994	1.502	5.163	3.437
KIF23	0.0347423	1.543	4.848	3.142
PRC1	0.0431403	1.565	6.202	3.963
KIF11	0.0824881	1.619	5.614	3.467
UBE2C	0.0467992	1.602	8.268	5.16
TOP2A	0.17319	1.984	7.3	3.679
APOBEC3B	0.229373	1.584	5.451	3.442
CEP55	0.0716755	1.693	5.62	3.32
DLK1	0.257899	1.565	5.148	3.29
CYBRD1	0.0673187	1.656	7.423	4.484
ALK	0.0637835	1.79	5.838	3.261
GNG4	0.248846	1.603	6.614	4.125
BUB1B	0.0474476	1.62	5.984	3.693
